# Supplementary material
Source: HighWire-hosted journal article supplement (https://erj.ersjournals.com/content/55/2/1900913)
Supplement: inline-supplementary-material-1 [file inline-supplementary-material-1.pdf]

## ONLINE SUPPLEMENTS

### Online Supplement S1. Measuring air pollution exposures.

a) ***Pollutants*** - PM<sub>2.5</sub> exposures were derived from total column aerosol depth retrievals from the Moderate Resolution Imaging Spectroradiometer (MODIS) that were related to near-surface PM<sub>2.5</sub> using the GEOS-Chem chemical transport model and adjusted with local ground-based observations through geographically weighted regression [1]. The resulting yearly (2004 to 2012) average surface layers gridded at approximately 1 km<sup>2</sup> resolution were extended to prior years (until 1998) by applying inter-annual variation from Boys et al [2]. Estimates of PM<sub>2.5</sub> greater than 20 µg/m<sup>3</sup> were excluded from the analysis because they are believed to be due to inaccurate satellite retrievals. NO<sub>2</sub> exposures were estimated for 2006 from a national land use regression model that combined National Air Pollution Surveillance (NAPS) fixed-site monitoring data, satellite NO<sub>2</sub> estimates, road length within 10 km, industrial land use areas within various buffers, and summer rainfall [3]. Ground-level NO<sub>2</sub> estimates were derived using GEOS-Chem [4] from satellite tropospheric NO<sub>2</sub> columns. Local variation in NO<sub>2</sub> was captured by applying kernel density measures of highways and major roads as a multiplier to the model [3]. Ozone exposures were estimated for the months of May to October for the period of 2002 to 2009 (8 hour daily maximum) using an air pollution-specific interpolation technique to generate a 21 km<sup>2</sup> grid [5]. The model combines modeled O<sub>3</sub> from the Canadian Hemispheric Regional Ozone and NO<sub>x</sub> system (CHRONOS) operational regional air quality forecast model [6] with ground-based observations from monitors in Canada and the United States. NO<sub>2</sub> and ozone data were adjusted for annual differences using a time series (1981 to 2012) of ground measurements from 24 census

divisions (CD). Annual means were calculated from NAPS daily mean concentrations (if  $\geq 18$  hourly readings available), and these were averaged for any CDs with more than one monitoring station [7]. Any gaps in the time series were imputed using an interpolation algorithm that combines classical prediction techniques and the phase-and frequency-fitting tools via the multitaper method [8], using the R package *tsinterp* [9]. For each of the 24 CDs, a cubic spline function was fitted to model the association between year and air pollutant. Ratios were determined for each year of follow-up and the source data year. For each year of follow-up, all locations were matched to the closest CD using Geographic Information Systems (GIS; ArcGIS v.10, ESRI 2010), and the corresponding time adjustment ratio was used to adjust data for annual differences in concentration. In addition to individual pollutants, we also employed total oxidants =  $[(1.07 \times \text{NO}_2) + (2.075 \times \text{O}_3)] / 3.145$  as a composite measure, with pollutant weights equivalent to their respective redox potentials [10]. Exposure surface concentrations of air pollution were then assigned to participants using the centroids of their postal codes at birth and cumulated from birth onwards. Given the peak incidence of asthma and other allergic disease in early childhood [11], we focused on exposures at baseline (birth) and early life (0 to 3 years of age).

- b)* **Greenness** - The Normalized Difference Vegetation Index (NDVI) Landsat Time Series was used to measure greenness (15-19). Composite measures of NDVI calculated by Google are created from all the scenes via Google Earth Engine in each annual period beginning from the first day of the year and continuing to the last day of the year. All the images from each year are included in the composite, with the greenest pixel as the composite value, where the greenest pixel is the maximum value of the NDVI. Annual NDVI metrics were linked to all

6-digit DMTI Spatial single postal code locations and surrounding areas within 100m [12].

NDVI provides an indication of the presence and condition of green vegetation with values typically ranging from  $-1$  to  $+1$ . Values of  $-1$  generally represent water, while values of zero ( $-0.1$  to  $0.1$ ) correspond to bare surfaces such as rock, sand, rooftops and roads. Higher values ( $0.2$  to  $0.4$ ) represent grassland or bush land and values of  $+1$  represent healthy green vegetation [13]. The greenness data surfaces for Ontario from 1996 to 2015 were obtained from the CANadian Urban Environmental Health (CANUE) research consortium (<https://canue.ca/>).

## References

1. van Donkelaar A, Martin RV, Spurr RJ, Burnett RT. High-Resolution Satellite-Derived PM<sub>2.5</sub> from Optimal Estimation and Geographically Weighted Regression over North America. *Environmental science & technology* 2015; 49(17): 10482-10491.
2. Boys BL, Martin RV, van Donkelaar A, MacDonell RJ, Hsu NC, Cooper MJ, Yantosca RM, Lu Z, Streets DG, Zhang Q, Wang SW. Fifteen-year global time series of satellite-derived fine particulate matter. *Environmental science & technology* 2014; 48(19): 11109-11118.
3. Hystad P, Setton E, Cervantes A, Poplawski K, Deschenes S, Brauer M, van Donkelaar A, Lamsal L, Martin R, Jerrett M, Demers P. Creating national air pollution models for population exposure assessment in Canada. *Environmental health perspectives* 2011; 119(8): 1123-1129.
4. Lamsal LN, R. V., Martin A, van Donkelaar M, Steinbacher EA, Celarier E, Bucsela EJD, Pinto JP. Ground-level nitrogen dioxide concentrations inferred from the satellite-borne Ozone Monitoring Instrument. *Journal of Geophysical Research Atmospheres* 2008; 113: D16308
5. Robichaud A, Menard R, Zaitseva Y, Anselmo D. Multi-pollutant surface objective analyses and mapping of air quality health index over North America. *Air quality, atmosphere, & health* 2016; 9(7): 743-759.

6. Pudykiewicz J, Kallaur A, Smolarkiewicz P. Semi-Lagrangian modelling of tropospheric ozone. *Tellus, Series B: Chemical and Physical Meteorology* 1997; 49: 231-248.
7. Shin HH, Stieb D, Burnett R, Takahara G, Jessiman B. Tracking national and regional spatial-temporal mortality risk associated with NO<sub>2</sub> concentrations in Canada: a Bayesian hierarchical two-level model. *Risk analysis : an official publication of the Society for Risk Analysis* 2012; 32(3): 513-530.
8. Burr WS. multitaper R package for computation and analysis of multitaper spectrum estimates. CRAN, 2012.
9. Burr WS. tsinterp R package for interpolation of stationary time series through univariate (hybrid Wiener) and bivariate techniques. 2015.
10. Bratsch SG. Standard electrode potentials and temperature coefficients in water at 298.15 K. *J Phys Chem Ref Data* 1989; 18: 1-21.
11. To T, Wang C, Guan J, McLimont S, Gershon AS. What is the lifetime risk of physician-diagnosed asthma in Ontario, Canada? *American journal of respiratory and critical care medicine* 2010; 181(4): 337-343.
12. Sbihi H, Tamburic L, Koehoorn M, Brauer M. Greenness and Incident Childhood Asthma: A 10-Year Follow-up in a Population-based Birth Cohort. *American journal of respiratory and critical care medicine* 2015; 192(9): 1131-1133.
13. Weier J, Herring D. Measuring vegetation (NDVI & EVI). 2000 [cited 2019 Feb 20]; Available from: <http://earthobservatory.nasa.gov/Features/MeasuringVegetation/>

## Online Supplement S2. Definition of covariates.

| <b>T-CHEQ Variable</b>                                          | <b>Type of Variable</b> | <b>Categories</b>                                                           |
|-----------------------------------------------------------------|-------------------------|-----------------------------------------------------------------------------|
| <b><i>Child Factors</i></b>                                     |                         |                                                                             |
| Sex                                                             | Binary                  | Female; Male                                                                |
| Child age at survey                                             | Continuous              |                                                                             |
| Child age at asthma, allergic rhinitis or eczema                | Continuous              |                                                                             |
| Low birthweight (<2500g)                                        | Binary                  | Yes; No                                                                     |
| Child breastfed                                                 | Binary                  | Yes; No                                                                     |
| Child ever attend a childcare facility/nursery school           | Binary                  | Yes; No                                                                     |
| Child born within 3 weeks of due date                           | Binary                  | Yes; No                                                                     |
| Years to asthma, allergic rhinitis, eczema, or end of follow-up | Continuous              |                                                                             |
| <b><i>Home Environmental Factors</i></b>                        |                         |                                                                             |
| Mould in home first year of life                                | Binary                  | Yes; No                                                                     |
| Roaches in home first year of life                              | Binary                  | Yes; No                                                                     |
| Gas cook/heat first year of life                                | Binary                  | Yes; No                                                                     |
| ETS exposure in first year of life                              | Binary                  | Yes; No                                                                     |
| Pets in home in first year of life                              | Binary                  | Yes; No                                                                     |
| <b><i>Parental/Demographic Factors</i></b>                      |                         |                                                                             |
| Income adequacy                                                 | Categorical             | Lowest; Lower Middle; Upper Middle; Highest                                 |
| Number of people in the household                               | Categorical             | ≤3, 4, ≥5                                                                   |
| Parent's highest level of education                             | Categorical             | Some college or below; College diploma; University degree; Master/doctorate |
| Either of the parents ever had asthma                           | Binary                  | Yes; No                                                                     |
| Parent history of atopy                                         | Binary                  | Yes; No                                                                     |
| <b>Pollutant Variable</b>                                       | <b>Type of Variable</b> | <b>Definition</b>                                                           |
| NO <sub>2</sub>                                                 | Continuous              |                                                                             |
| O <sub>3</sub>                                                  | Continuous              |                                                                             |
| PM <sub>2.5</sub>                                               | Continuous              |                                                                             |
| NDVI                                                            | Continuous              |                                                                             |
| Oxidants                                                        | Continuous              | $[(1.07 \times \text{NO}_2) + (2.075 \times \text{O}_3)] / 3.145$           |

*Abbreviations:* ETS=environmental tobacco smoke; NO<sub>2</sub>=nitrogen oxide; O<sub>3</sub>=ozone; PM<sub>2.5</sub>=particulate matter with a diameter of 2.5 µm; NDVI=normalized difference vegetation index.

**Online Supplement S3. Hazard ratios of PM<sub>2.5</sub> and outcomes stratified by tertile of total oxidants.**

a) At birth.

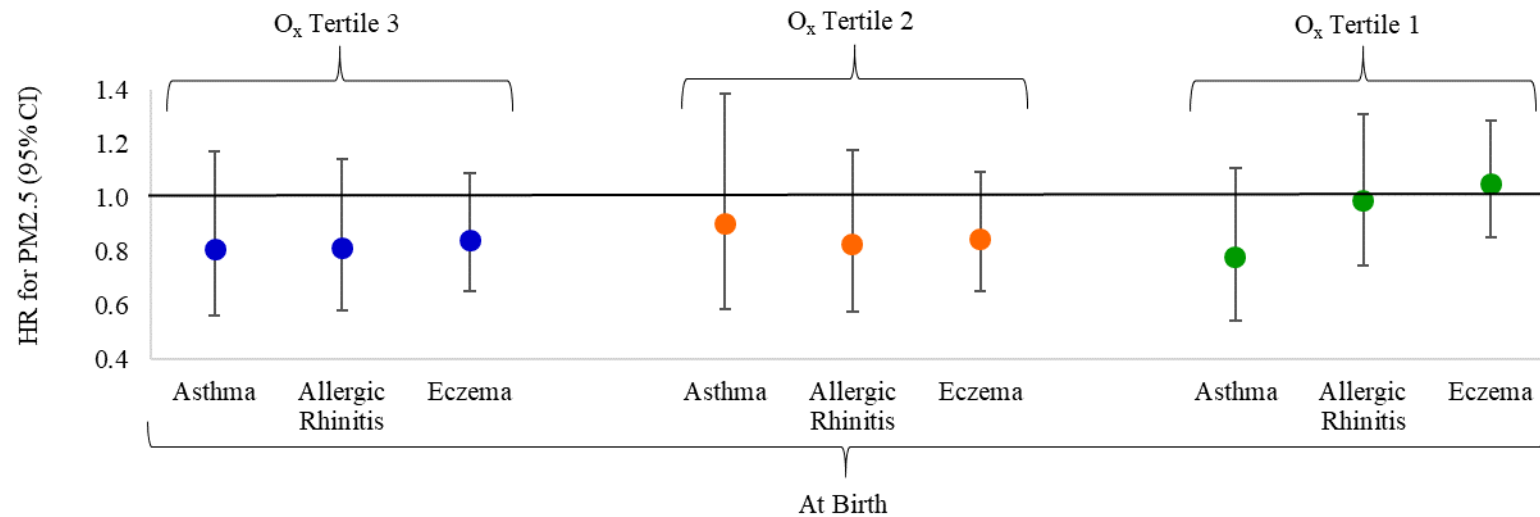

Hazard ratios for PM<sub>2.5</sub> reflect changes of 4.26 µg/m<sup>3</sup>. O<sub>x</sub> = oxidant.

b) During the first 3 years of life.

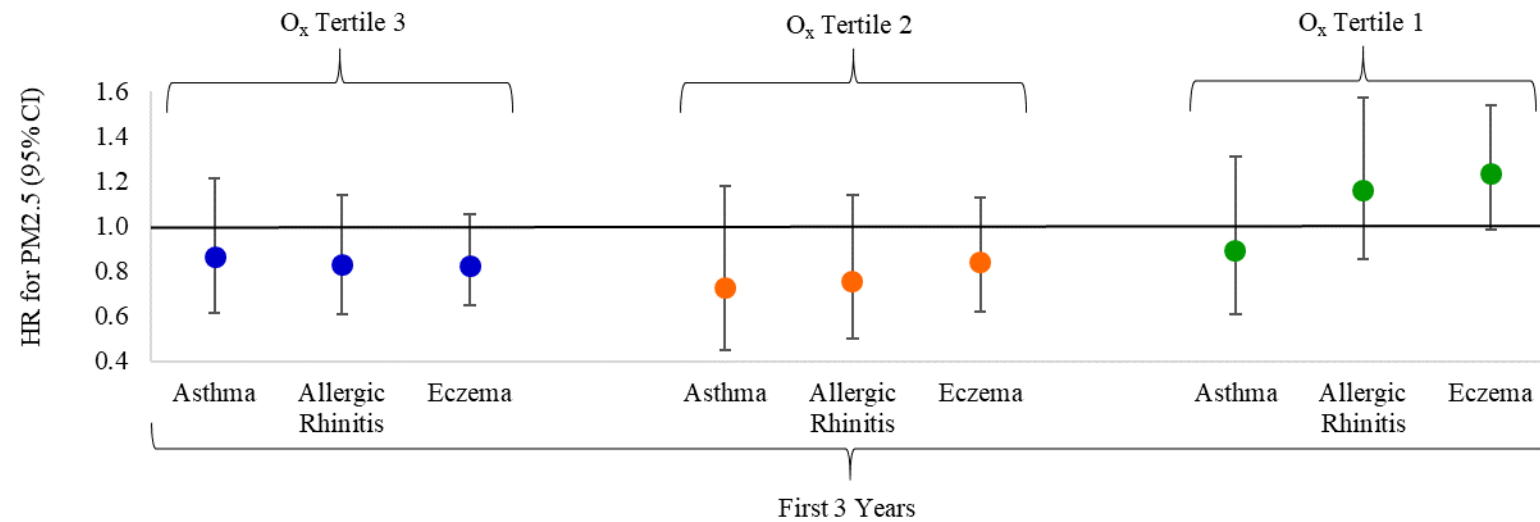

Hazard ratios for PM<sub>2.5</sub> reflect changes of 2.66 µg/m<sup>3</sup>. O<sub>x</sub> = oxidant.

**Online Supplement S4. The original and current study cohort.**

a) *Flow diagram showing study cohort assembly.*

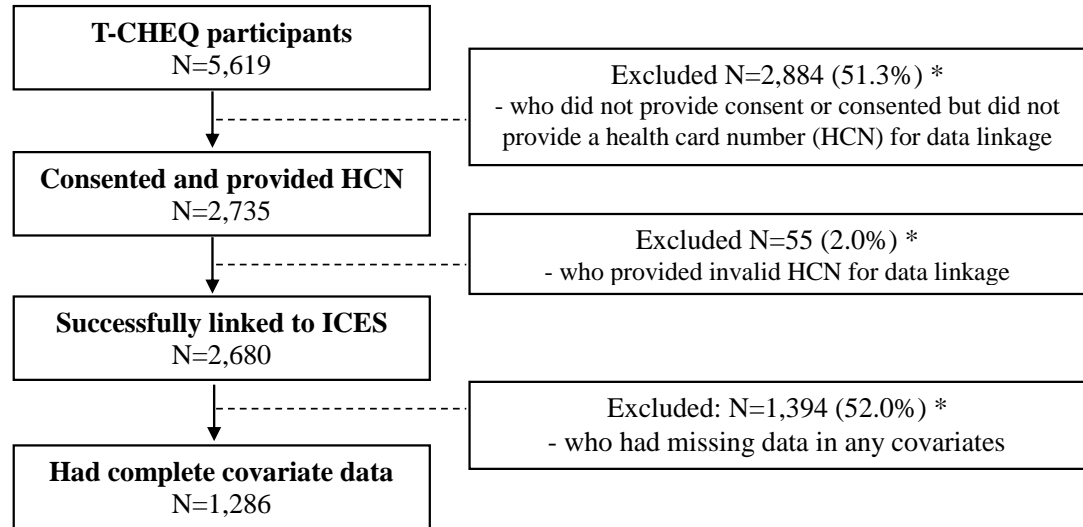

\* Proportion excluded from previous step.

b) *Distribution of parent-reported conditions at the time of the T-CHEQ survey.*

| Parent Reports | TCHEQ Total Cohort<br>(N=5,619) | Consented Birth Cohort<br>(N=1,286) | p-value |
|----------------|---------------------------------|-------------------------------------|---------|
| Ever asthma    | 16.20%                          | 16.74%                              | 0.6365  |
| Ever rhinitis  | 24.10%                          | 22.04%                              | 0.1174  |
| Ever eczema    | 24.30%                          | 23.44%                              | 0.5159  |

The distribution of parent-reported conditions does not show any statistically significant differences between the original cohort and the current study cohort.
