# Supplementary material
Source: HighWire-hosted journal article supplement (https://erj.ersjournals.com/content/55/2/1900913)
Supplement: inline-supplementary-material-2 [file inline-supplementary-material-2.pdf]

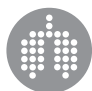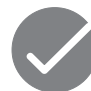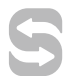

SHAREABLE PDF

# Early life exposure to air pollution and incidence of childhood asthma, allergic rhinitis and eczema

Teresa To<sup>1,2,3</sup>, Jingqin Zhu<sup>1,3</sup>, Dave Stieb<sup>4</sup>, Natasha Gray<sup>1</sup>, Ivy Fong<sup>1</sup> , Lauren Pinault<sup>5</sup>, Michael Jerrett<sup>6</sup>, Alain Robichaud<sup>7</sup>, Richard Ménard<sup>7</sup>, Aaron van Donkelaar<sup>8,9</sup>, Randall V. Martin<sup>8,9,10</sup> , Perry Hystad<sup>11</sup>, Jeffrey R. Brook<sup>2</sup> and Sharon Dell<sup>1,2</sup>

**Affiliations:** <sup>1</sup>Child Health Evaluative Sciences, Research Institute, The Hospital for Sick Children, Toronto, ON, Canada. <sup>2</sup>Dalla Lana School of Public Health, University of Toronto, Toronto, ON, Canada. <sup>3</sup>Institute for Clinical Evaluative Sciences, Toronto, ON, Canada. <sup>4</sup>Environmental Health Science and Research Bureau, Health Canada, Ottawa, ON, Canada. <sup>5</sup>Analytical Studies Branch, Statistics Canada, Ottawa, ON, Canada. <sup>6</sup>Fielding School of Public Health, The University of California, Los Angeles, CA, USA. <sup>7</sup>Air Quality Research Division, Environment and Climate Change Canada, Dorval, QC, Canada. <sup>8</sup>Dept of Physics and Atmospheric Science, Dalhousie University, Halifax, NS, Canada. <sup>9</sup>Dept of Energy, Environmental and Chemical Engineering, Washington University in St Louis, St Louis, MO, USA. <sup>10</sup>Harvard-Smithsonian Center for Astrophysics, Cambridge, MA, USA. <sup>11</sup>College of Public Health and Human Sciences, Oregon State University, Corvallis, OR, USA.

**Correspondence:** Teresa To, Child Health Evaluative Sciences, The Hospital for Sick Children, 686 Bay Street, Toronto, ON M5G 0A4, Canada. E-mail: [teresa.to@sickkids.ca](mailto:teresa.to@sickkids.ca)

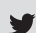

@ERSpublications

This study found that exposure to total oxidants at birth increased the risk of developing asthma by 17% and eczema by 7%. Adverse impacts of exposure to air pollutants, particularly ozone and nitrogen dioxide, may have their origins in early life. <http://bit.ly/33PCIYN>

**Cite this article as:** To T, Zhu J, Stieb D, *et al.* Early life exposure to air pollution and incidence of childhood asthma, allergic rhinitis and eczema. *Eur Respir J* 2020; 55: 1900913 [<https://doi.org/10.1183/13993003.00913-2019>].

This single-page version can be shared freely online.

## ABSTRACT

**Rationale:** There is growing evidence that air pollution may contribute to the development of childhood asthma and other allergic diseases. In this follow-up of the Toronto Child Health Evaluation Questionnaire (T-CHEQ) study, we examined associations between early life exposures to air pollution and incidence of asthma, allergic rhinitis and eczema from birth through adolescence.

**Methods:** 1286 T-CHEQ participants were followed from birth until outcome (March 31, 2016) or loss to follow-up, with a mean of 17 years of follow-up. Concentrations of nitrogen dioxide (NO<sub>2</sub>), ozone (O<sub>3</sub>) and particulate matter with a 50% cut-off aerodynamic diameter of 2.5 µm (PM<sub>2.5</sub>) from January 1, 1999 to December 31, 2012 were assigned to participants based on their postal codes at birth using ground observations, chemical/meteorological models, remote sensing and land-use regression models. Study outcomes included incidence of physician-diagnosed asthma, allergic rhinitis and eczema. Cox proportional hazard regression models were used to estimate hazard ratios per interquartile range of exposures and outcomes, adjusting for potential confounders.

**Results:** Hazard ratios of 1.17 (95% CI 1.05–1.31) for asthma and 1.07 (95% CI 0.99–1.15) for eczema were observed for total oxidants (O<sub>3</sub> and NO<sub>2</sub>) at birth. No significant increase in risk was found for PM<sub>2.5</sub>.

**Conclusions:** Exposures to oxidant air pollutants (O<sub>3</sub> and NO<sub>2</sub>) but not PM<sub>2.5</sub> were associated with an increased risk of incident asthma and eczema in children. This suggests that improving air quality may contribute to the prevention of asthma and other allergic disease in childhood and adolescence.
